# Supplementary figures and images for: RETRACTED ARTICLE: PIK3R3, part of the regulatory domain of PI3K, is upregulated in sarcoma stem-like cells and promotes invasion, migration, and chemotherapy resistance
Source: PubMed Central journal article supplement (PMC8319167; doi:10.1038/s41419-021-04036-5), 2021-07-29

# Supplementary Fig.S1

**A**

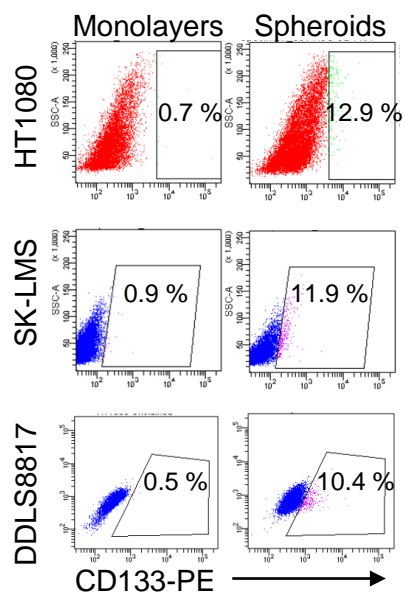

**B**

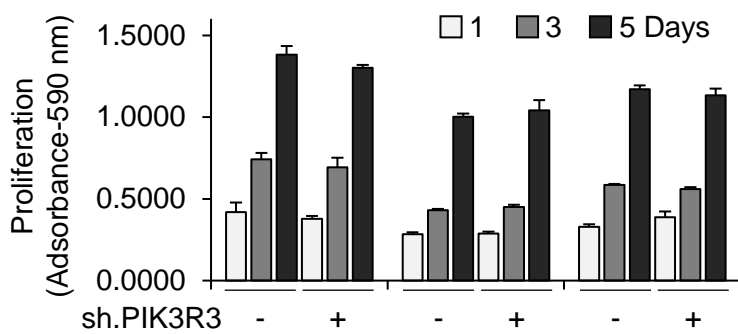

**C**

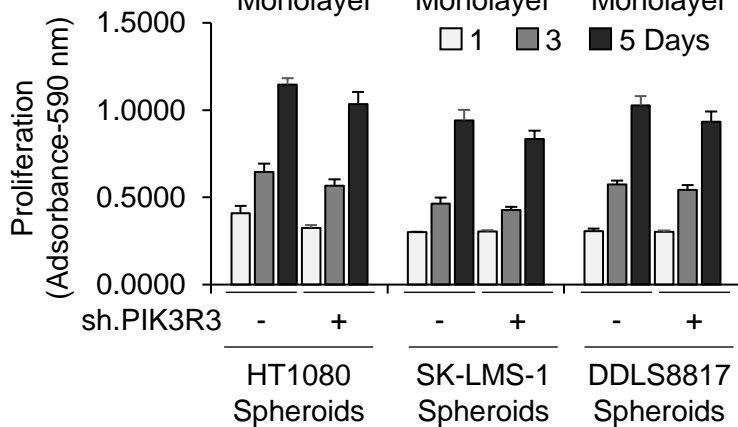

**D**

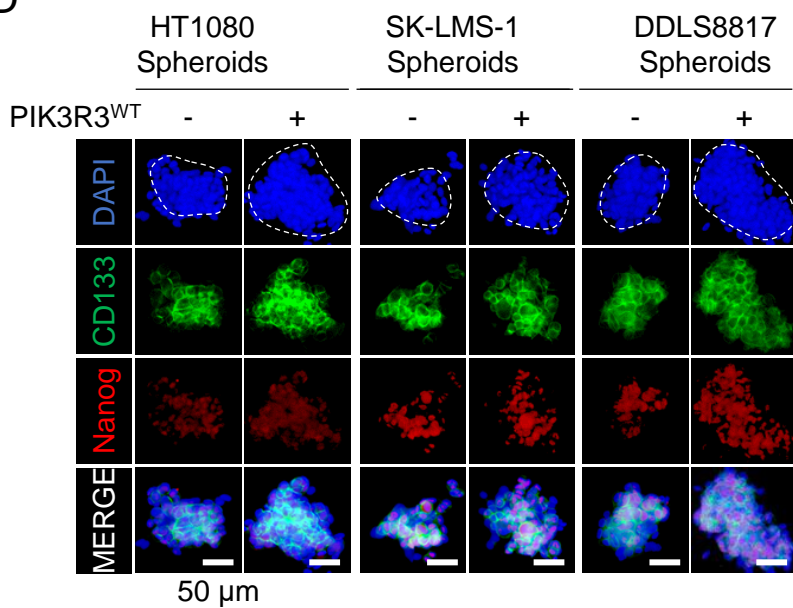

Supplement: 41419_2021_4036_MOESM2_ESM.pdf [file 41419_2021_4036_MOESM2_ESM.pdf]

# Supplementary Fig.S2

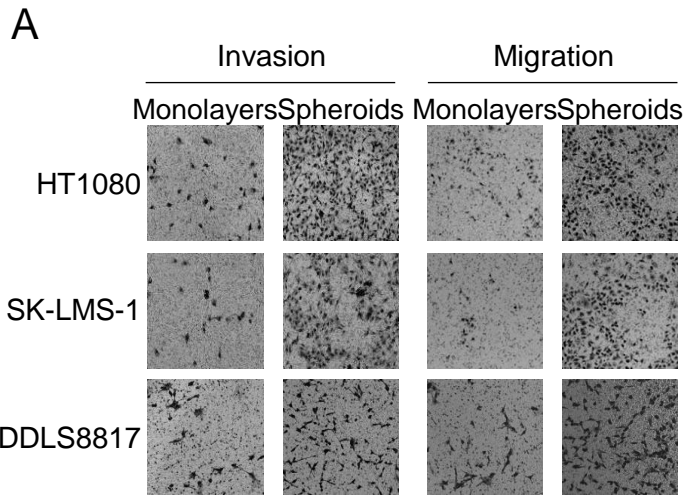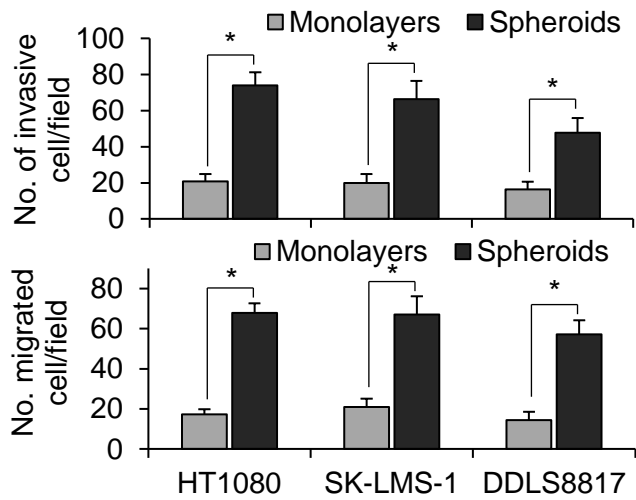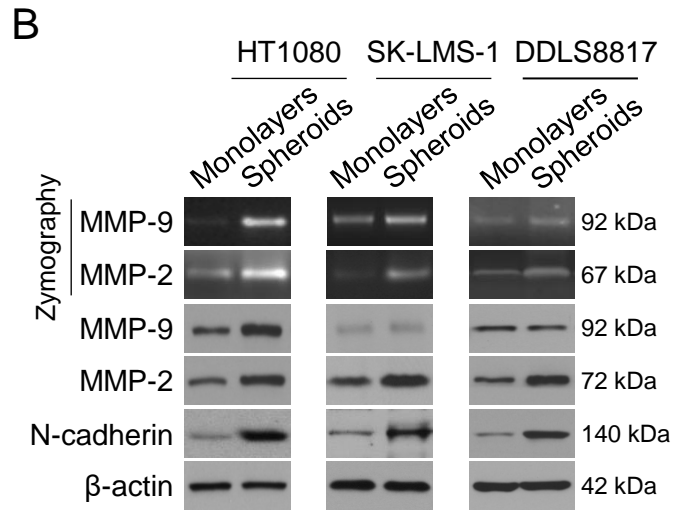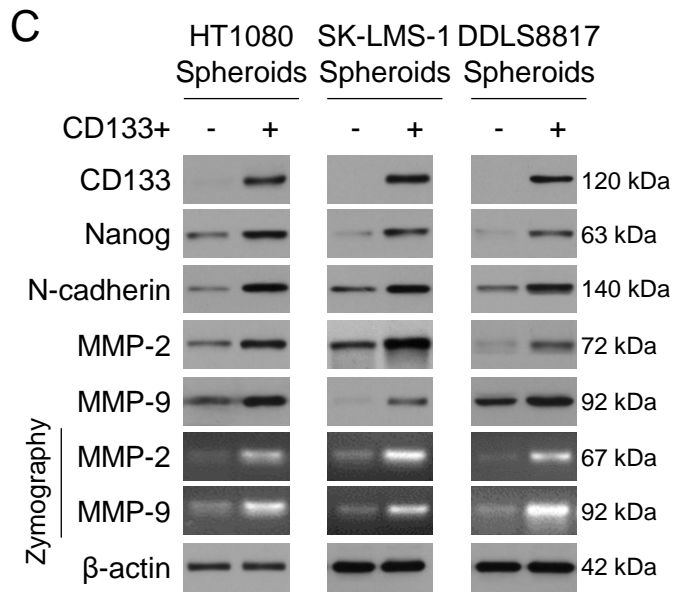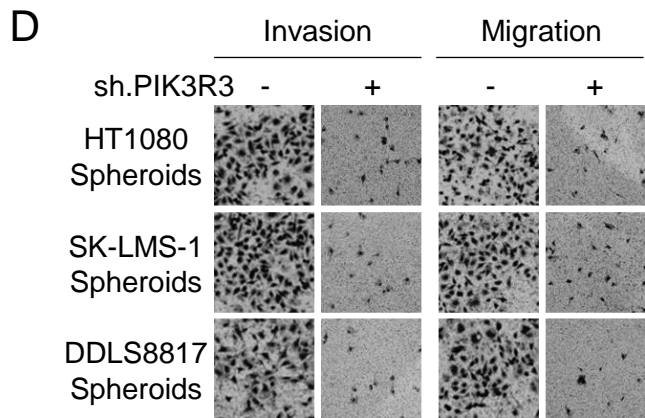

Supplement: 41419_2021_4036_MOESM3_ESM.pdf [file 41419_2021_4036_MOESM3_ESM.pdf]

# Supplementary Fig.S3

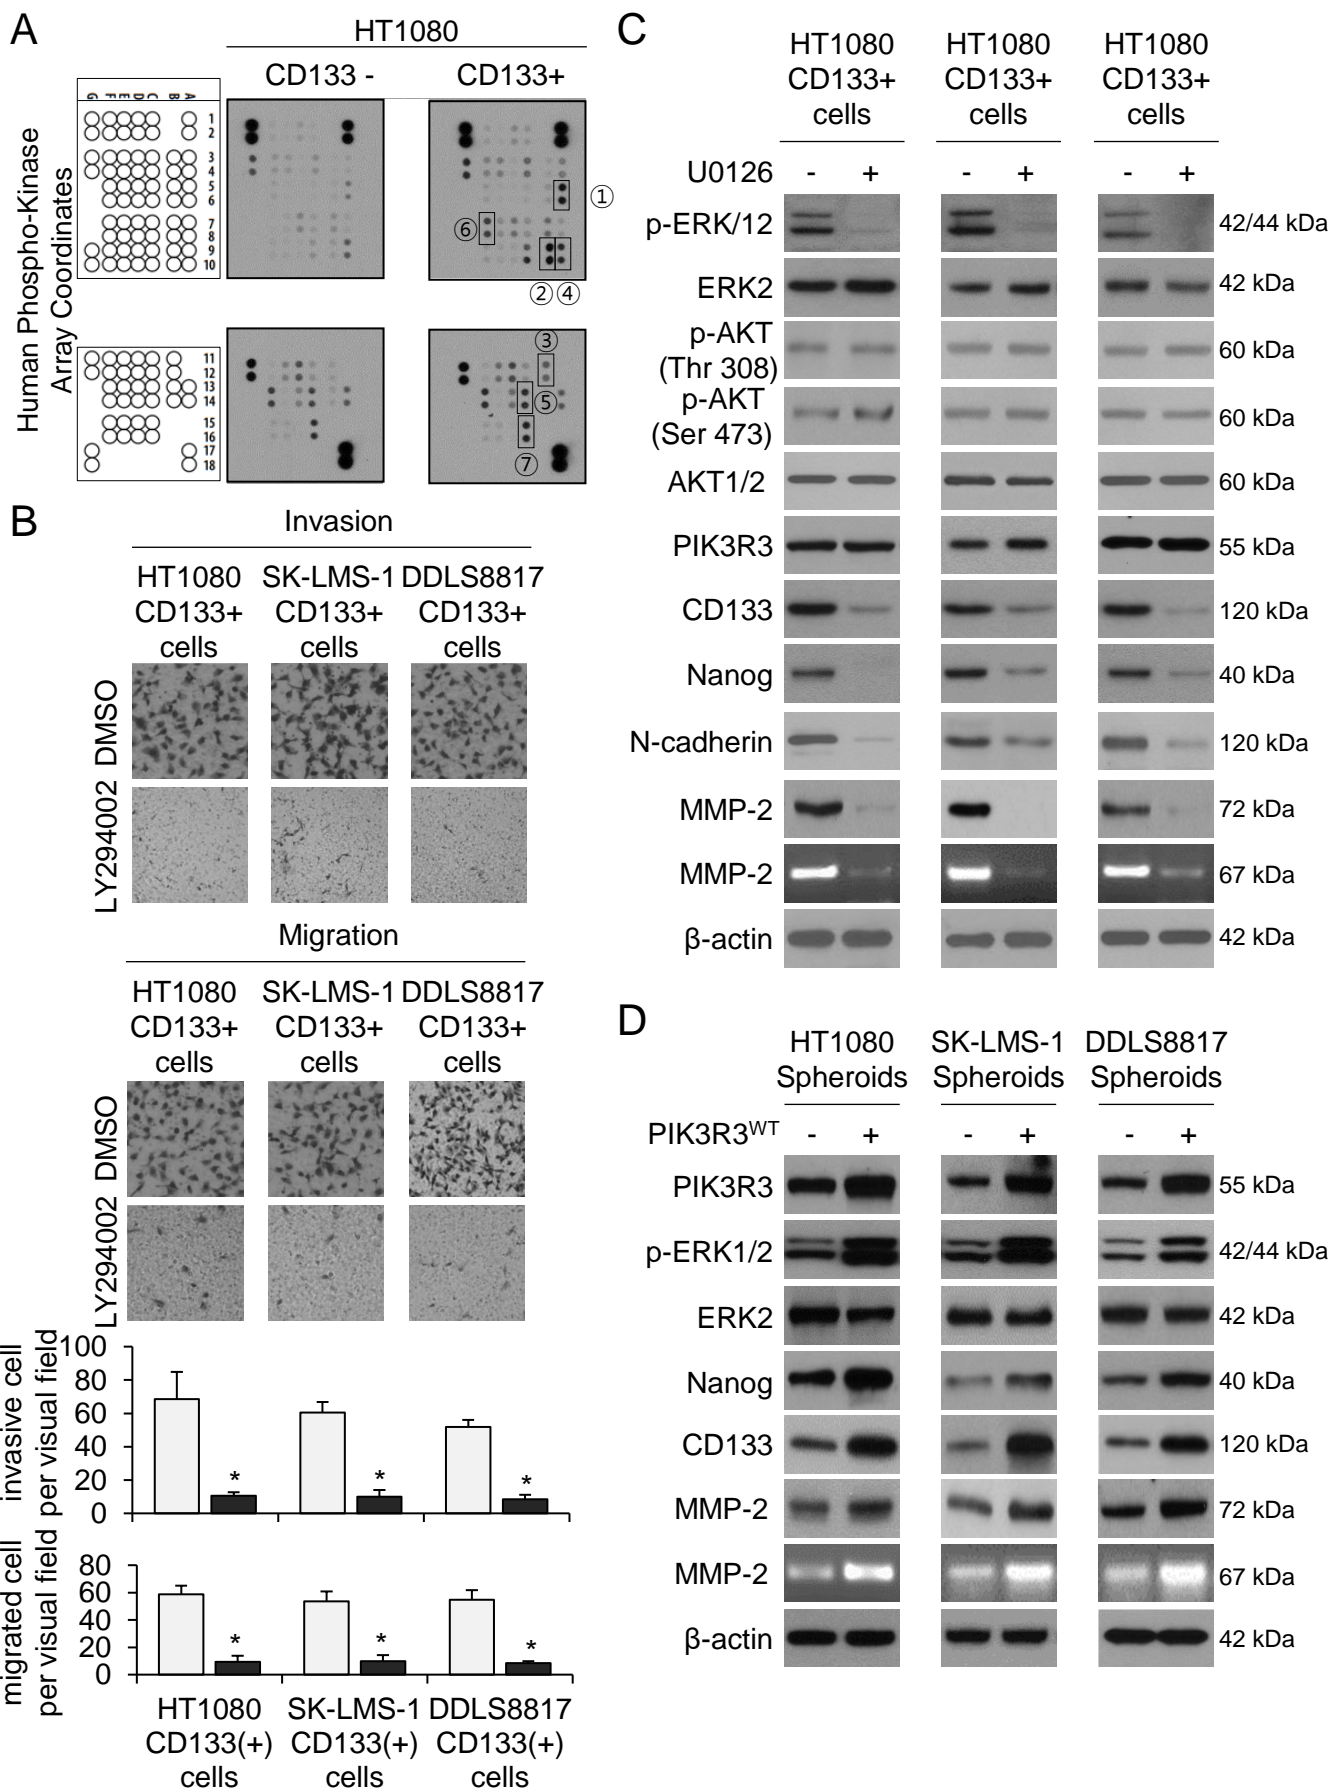

Supplement: 41419_2021_4036_MOESM4_ESM.pdf [file 41419_2021_4036_MOESM4_ESM.pdf]

# Supplementary Fig.S4

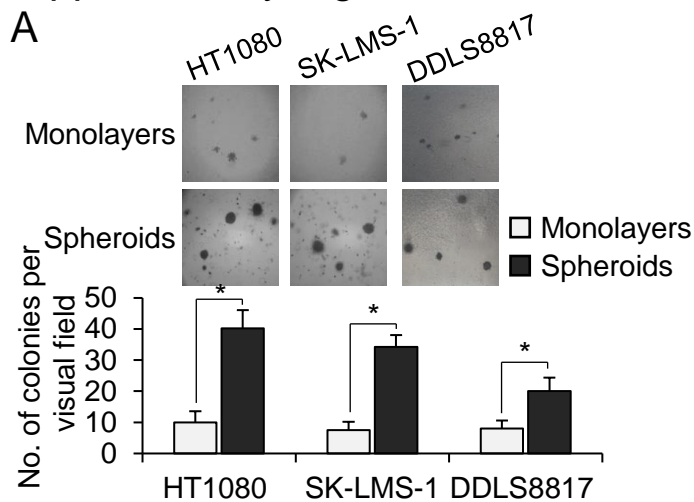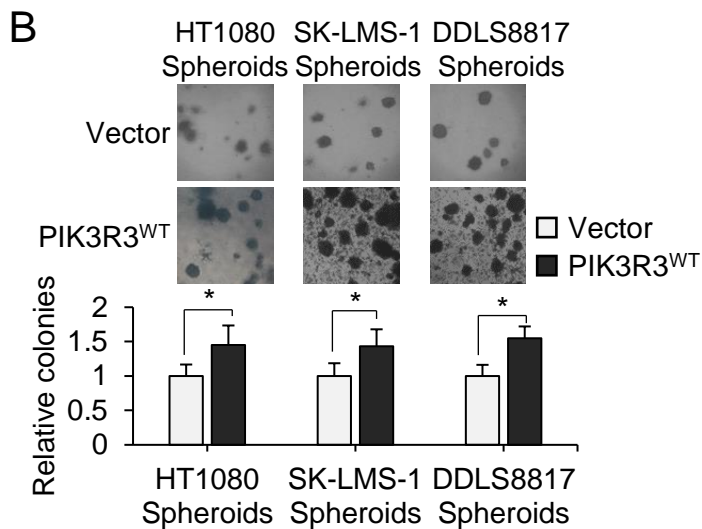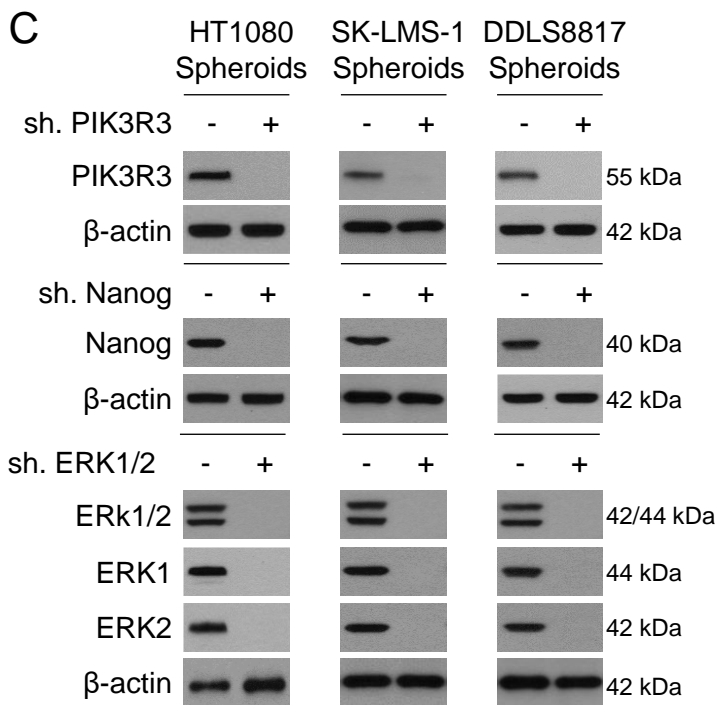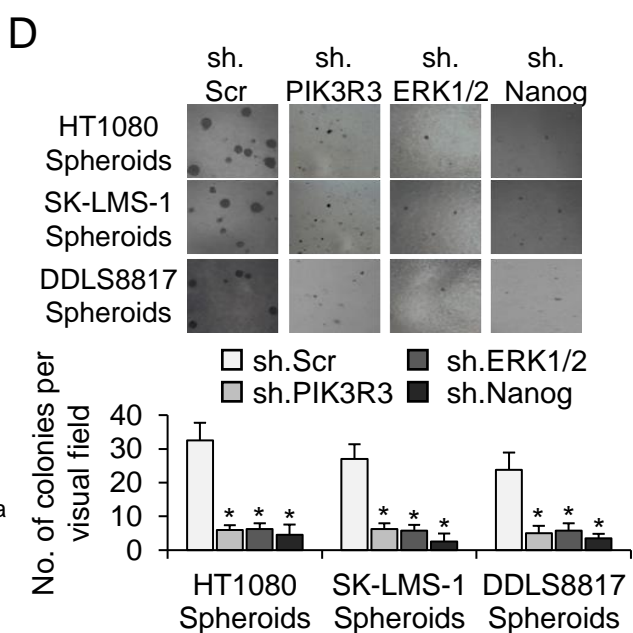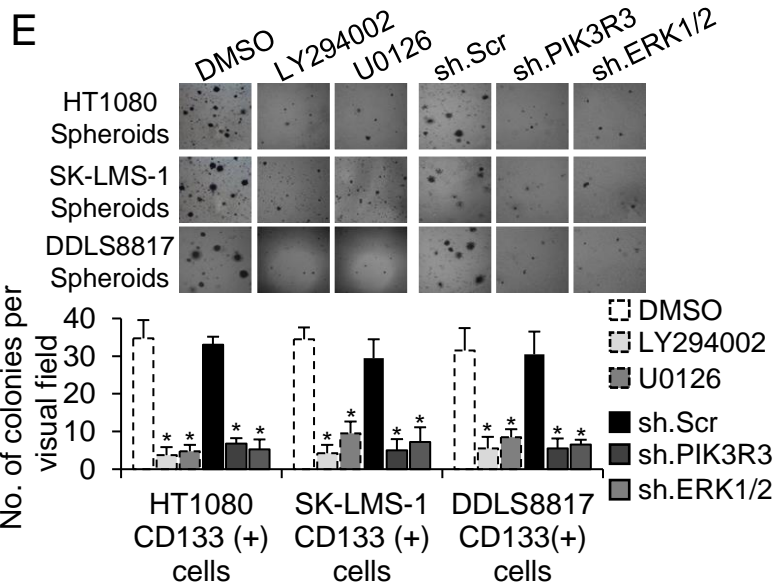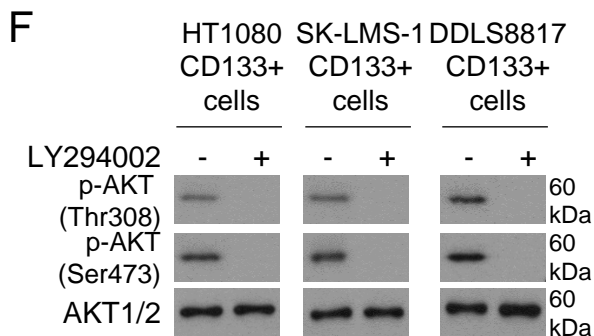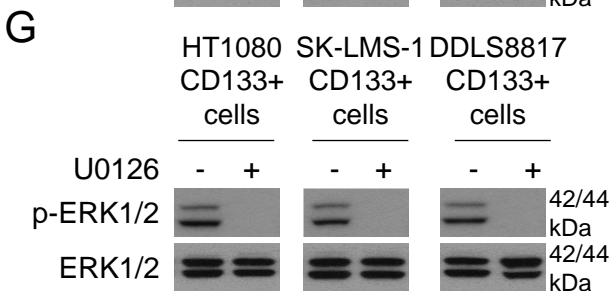

Supplement: 41419_2021_4036_MOESM5_ESM.pdf [file 41419_2021_4036_MOESM5_ESM.pdf]

Supplementary Fig.S5

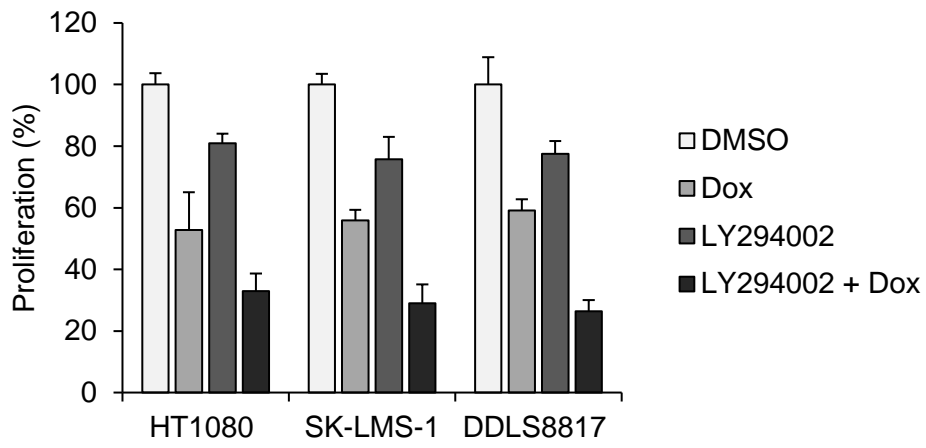

Supplement: 41419_2021_4036_MOESM6_ESM.pdf [file 41419_2021_4036_MOESM6_ESM.pdf]

# Supplementary Fig.S6

**A**

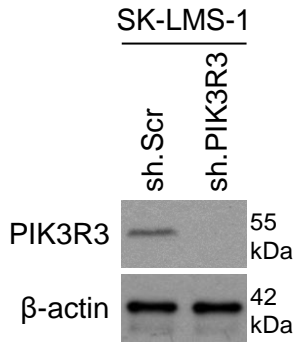

**B**

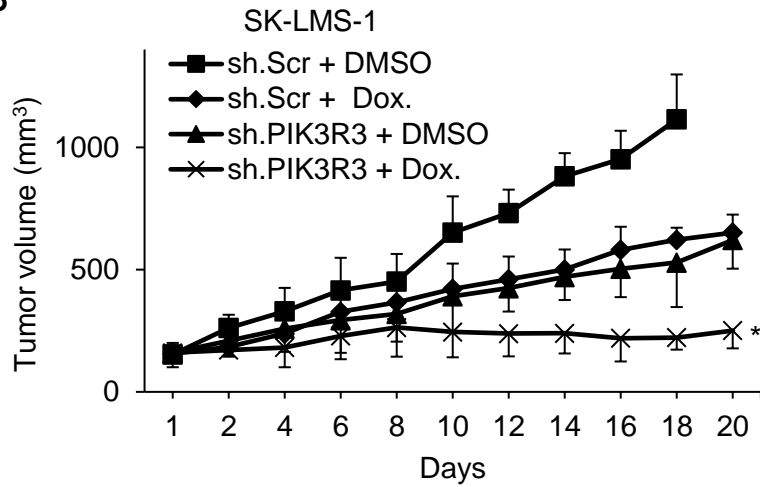

**C**

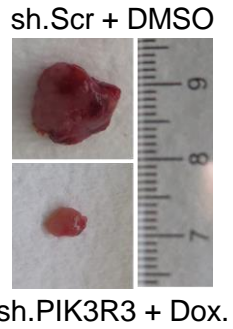

**D**

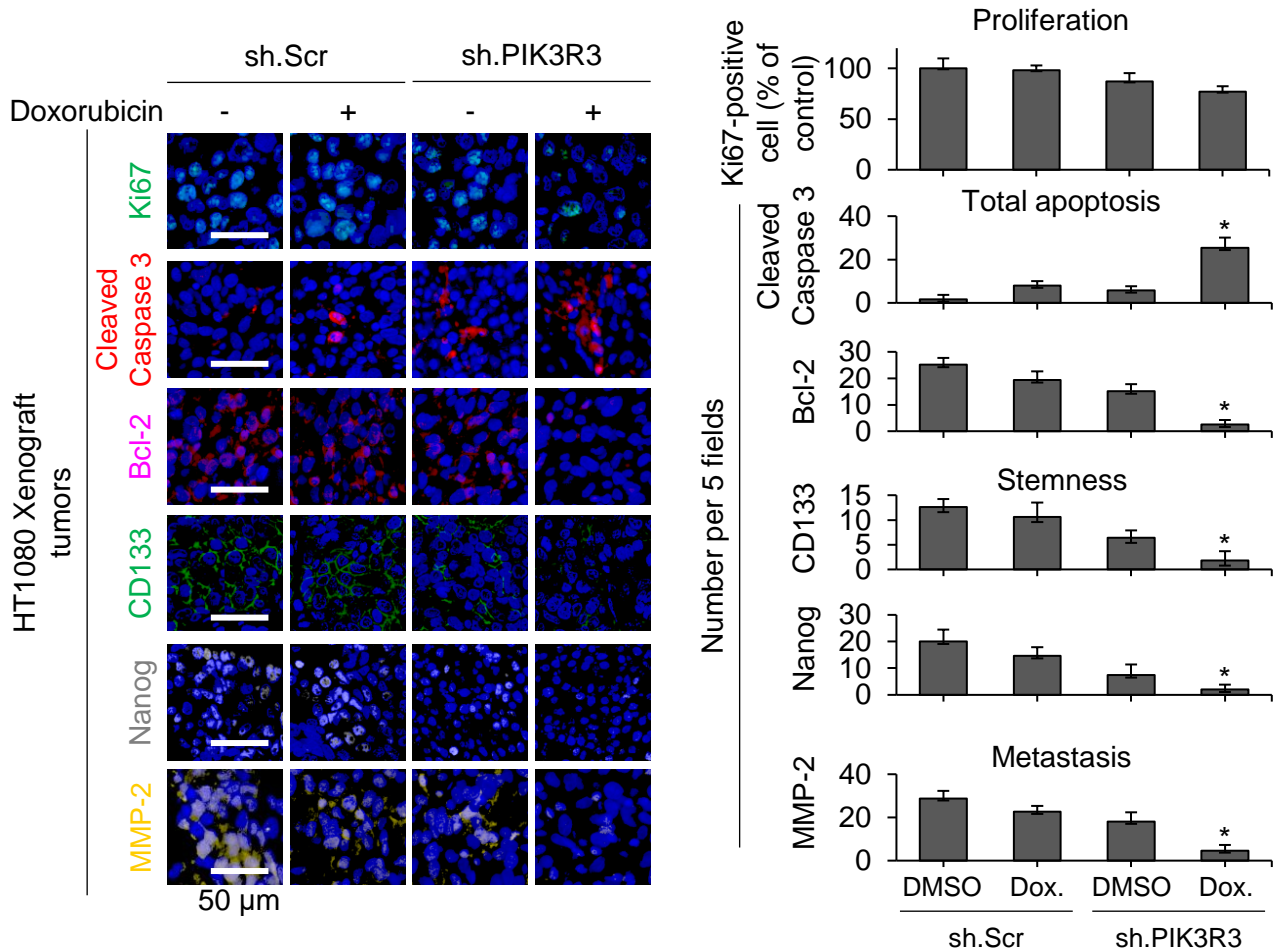

Supplement: 41419_2021_4036_MOESM7_ESM.pdf [file 41419_2021_4036_MOESM7_ESM.pdf]

# Supplementary Fig.S7

**A**

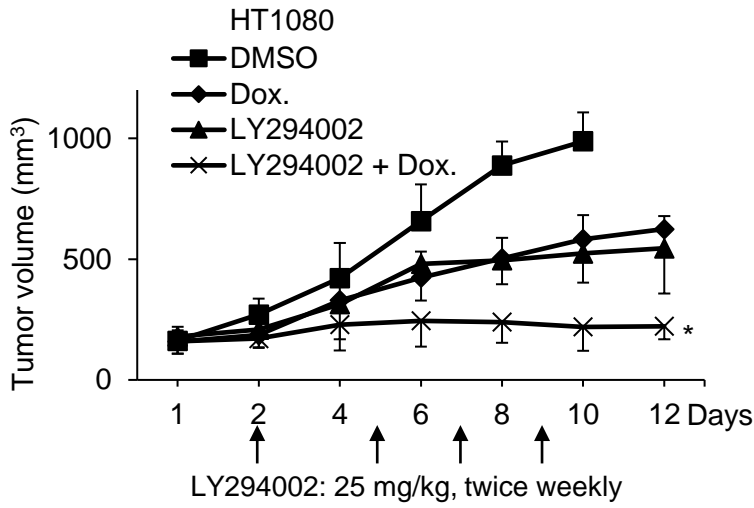

**B**

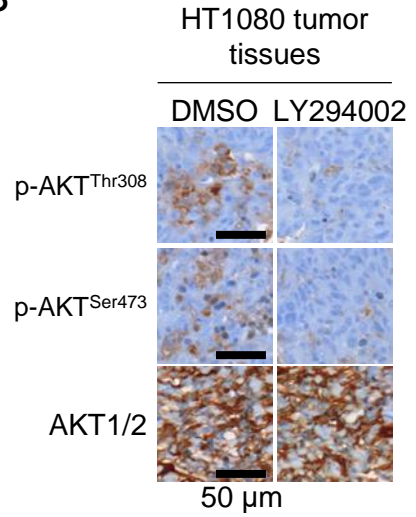

**C**

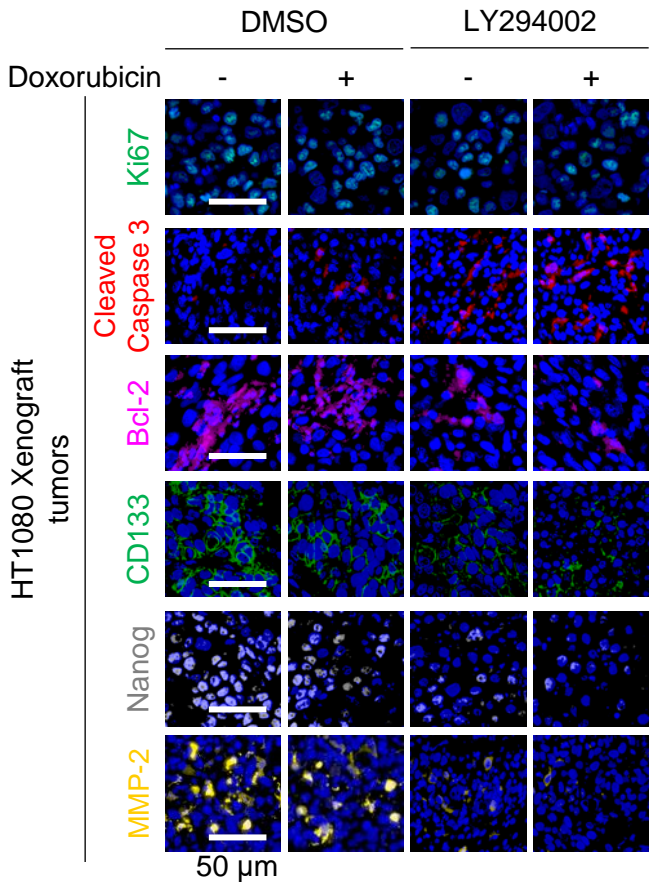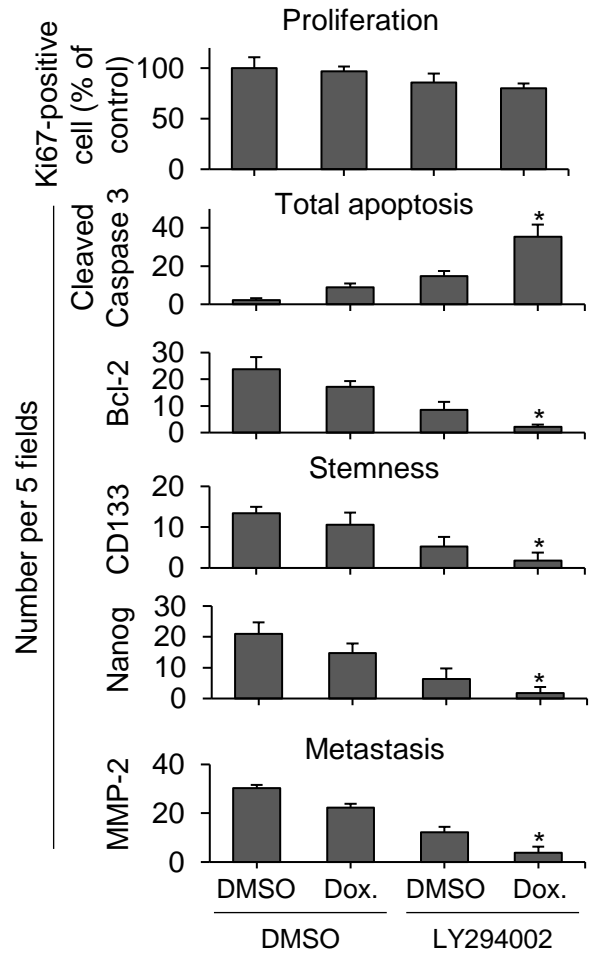

Supplement: 41419_2021_4036_MOESM8_ESM.pdf [file 41419_2021_4036_MOESM8_ESM.pdf]
